# Supplementary material for: The role of Transposable Elements in shaping the combinatorial interaction of Transcription Factors
Source: PubMed Central journal article supplement (PMC3478180; doi:10.1186/1471-2164-13-400), 2012-08-16
Supplement: 1471-2164-13-400-S5.pdf [file 1471-2164-13-400-S5.pdf]

**GTGACC**TTGGGCAAGTTACTTAACTCTCTGTGCCTCAGTTTCCTCATCTGTAAAATGGGGATAATA

--AAAATTGCTCA**GGTCAC**CTTGCCTCAGTGAGCCTTGTTTTATTTACCTTTAAAATAGGGGTTATA  
A-AACCTTGG-CAATCCAATGGACTTCTCTGTCCCTTACTTTTCCAGG-**GTCAA**ACGAGATTA  
-----AACCCGCCCCAGACTCAGTTTC-TCACTTGTGCA-TGGGGCCAGTA  
AAGACTCCAGGCAAGCTG-TGGACTGGCCATGCCTCAGTCTCCCGACTGTTACATGCAGCAAGTG  
AAGCCCTCCGGCAAGGTTTCGAACCTCTCTG-----GCTGAGATAAAGTGATAACA  
-----AAGTATTTCACTTTTCCGGATTTCTGTTTGCT-ATCTGTAAAATGA-----  
AATTCCTTGGGCAGCTCACTTTACTTCCCAAGCCTCCATTTTCTCATCTATAAAAATGAGGATAATA  
ACAACCTTGGCACGGCACT-AACCTTCTGTGCCT--GTTTCTTGGTTAACAAAAATGGGTATGATT  
-----ACCACCCTCATGCCTCAGTTTTCCCATCTCTAAAAGTGGGGGTAAACA  
-----ACCCACTGCCCCAGCTTTTCTCATCTACAAAAACAGGGATGCTA  
-----ACTTCACCTTTTGGGGCGTCTGTATCCTCATCTACAAAA-----ATGGTA  
-----ACTTCTCTGCACCTCAGATTCTGCATCCATAATTGGGGGCG-----  
AGAACCTTG-----CTTAGCTTGTCTTTGCTTCCGTTGCCCATATGTGAAGTGGTATGTTA  
AGAACCTTAAAGCAATTCAGTTAACTTCTCTGTGCCTCGTTTCTCATCTGTGTAA----ATAGGA  
AGAAGACTGGG---ACTAGTTAATTTCTCCAGTGCTCAGCTTC-TTATCTACAGG-TAAGAATTGTC  
AGGATCTTGGGCAAGTTTCTTA-TCTGTCTAAGCCTTGACTTCATCAGATGGAAAGTGGAGCTAATA  
-----AGGGGTATTG  
-----AGGTTCTACTGCTCTCTG-GCCTCAGGCTACTCACCTGCAAAAATAAAGAG----  
ATAACCTTGAGAAAAGTTACTTAGCCAGTCTAAATCTCATGTTCCCTCAAGTCAAATGGGGATAATG  
ATAACCTTGAGAATATT-CTTA-----CCTCCTCTGTCAAATGGAGACAAGA  
ATAACCTTGCTAAGTTACTTAACTCCTCTATGCCTCAGTTTCTTCATCTGTAAAACAGGGGTAACA  
ATAACTTGGAGCAAGTAACT**TTGACC**TCGCTAGCCTTTGTTTTCTCATATTTAAAAT----ACGTCA  
ATAGCCCTGGACAAAAGGTTTTGCCTGTCTGGTCCAGTTTTCTCA-----  
ATCAGTTCTATAAAGTTCCTAAGTTCCTCAGACCTCTATTTCTTCATCTCGAAAACCTGGGAGAAT-  
ATGA-----ACCATTCTGAGCCTTAGTTTGCTTTCTATAAACCGGGGAGAGCA  
ATGACATAGGGCAAATTGCT**TTGACC**CTCTGAGCCTCAGTGTATCACCACAAA-TGGGCATGGCA  
**ATGACC**CTAAATCGACATTTACAATTTCTT-----  
**ATGACC**CTGAGCAAGTCCCTTCTCTGCCCTGGGCCTCAGTCTCCCATCTATAATAGG-----  
**ATGACC**CTGGCCAGCTCCCTCC-----  
**ATGACC**CTGGGCAAGTTGCCCACTTCGGCGAGACT--GTTTCCTCA-CTATAAAAATAGTGGCAATT  
**ATGACC**TCAGGCCAGCCACTTTAACTCTCAGTGCCTCA-TTTCTCTAACTTTAAAATA-----  
**ATGACC**T-GGGCTAGCGAGGGAAGCTGTCTAGTCTTTGTTTTCTGGTCTG-GGAATGGGTTTGATG  
**ATGACC**TTAGGCCAGTTGTTTAA--TTTT**BTGACTCAGC**TTCTTCTTC----ATGTCAGTTCTATC  
**ATGACC**TTAGGTAAGATA-----  
**ATGACC**TTGAATA**GGTCAG**CTAAACTTTCCAGGCCTC-----  
**ATGACC**TTGAGTACAT--ATGCCCTTCCCTAGGCTTCAATCTCTCAATCTATGAAACAAGGA-----  
**ATGACC**TTGCCAAGGT--CTGGACCTCT--GTGCCTCAGTTTCTCAGGTATAAAAATGGAGGTAAGG  
**ATGACC**TTGGGCAA**GTGACC**TGTCCTCTTGGGACCTGATTTGCCCAACTGCAAAGTG-----  
**ATGACC**TTGGGCAAGTTGCCAGTCTCCCTGT-----  
**ATGACC**TTGGGCA--TTAT**TTGACC**GTTTA--CTGCAGTTTCTCCTGTGTAAAATGGGGATAGTT  
**ATGACC**TTGGGTAAGCGG---ATCCCTTAAATTC-----  
**ATGACC**TTG-----TTAATTTTCTCTCTGTACCTCAGTTTC-TCAT-----GTGAAA  
ATGACTTTAGGCGAACTACTTAGCCTTT-TAAGTCTCAGTTTCTTCTTCAAGGAAAATGTGACAAAG  
ATGACTTTGAGCT-GTTACTTA-----CCTCAATTTTCTTATCTCTGAAATGGAGATCACT  
ATGACTTTGTGTAAGTCATTAACCTTCC--AAAGTTGAGTTTTCTCATACATACAATGGGGAT----  
ATGATCTTGGGCATATTACTTAACTCCCTGTGCCTCAGTCTCCTCATCTGTCAAACAGGAATGACA  
ATGATCTTGTGTAAGT--CTCCACCTCTCCACGCCTCAGTTTCTCGTCCGAAAAACAAGGATGTTA  
ATGATGTTGGGCAAGTTATTTAACCTCACTGTGCTTTAATTTCTTTCTGTGAAA-AAAGATAATC  
ATGCCCTTGGGCCA--TACTT----CCTCTGCGCCTCAGCTT-----  
ATG-CGTTGTGCA**AGTACTGAGC**CTTGCTTTGCCTCA-----TCTGATAAATGGGG-----  
ATGGACTTGACTGAGTTAGGAACCTCTCTGGACCTTCAATTTCTTCATATGTAAA-TGAGAATGCAT  
ATGGCCCTCATCGAGGCCCTTCCCTCTCTGGACCTCAGTTTC-TCAT-TGCAGGATGAGAAGATCA  
ATGGCCTGAGGAAAGCGACCCAGCCTCTCTGACACTCAGCGTCTGAGCTGTGAAGTGGTGGTGGGA  
ATGGCCTTGGACAGGTGGCTTACGTCTCTGGGCCTCAGGTGCCTCCTGTCT-----  
ATGTCCTTGGGTA**GGTCAC**TTT-CCTCTCCAGGCCTC--CTTCCCATCG**GGTCAA**T-----  
ATGTCCTCATCTCA--TACCAACCTCTCTGGACCTTGATCTCCTCCTTTGTAAAACAGAGATAATG

ATTACTTGGGAGAAGTTACT**TTGACC**TCTTTGGGCCTCAGTTTCCTCACCCATAAAGTGGGGAAAGTA  
-----CAGCTTCCTCCTTCTCTAAACCGGAATAA--  
-----CATTTTCCTCATGTGTAATA-TGGGGGCAATA  
---CCATAGCCAAGTTGCTTCAACTCT--GCATATCCATTTTCTTATCTATGACATGAAGGTATTA  
-----CCCCATTTCCCTCACCTGTGAAATGAGAATAGTA  
-----CCCCCTGGCCCTCAGCTTCTTCATCTATAAGATGAAG-TGGT-  
---CCCTGGATGCCTTCCTG---TCTTCTGTGC-TCAGGCTTTCAGCTGGAAAATGGGAA-----  
CCGGCCTCAG-CGGGCTGG**CTGACC**TCTCGGTGCCTTGGCTTCATCACCCGTA AAAACAGGGAGAACC  
---CCTCAGGCAAGTTACTTAACT-TACATGCCTCAGTTTTCTCATCTGGAAAATGAGAAC----  
-----CCTCTCCATGCCTTG**GTGCC**GCATCAGTAAAATGGTGACAATA  
----CCTGGGCAAGC-GCTTTACCTCTCTGTGCCTCGGTTTGCTCATCTGGGAATTGGGGATGTTG  
-----CCTGGGCCTTAGGTTGTTCAACCGTAAAATGTGGTTAACA  
---CCTTGGACAAGTGAGTTTCCCTCTCCGTGCCTCAGTTTCCTCATTTGGGAAATGGGAATAATG  
---CCTTGGAC--CTTCTCTATCCTACCATGTCTTGGTTTCCTCACTTTAAAAATGGGGATATAG  
-----CCTTGGCTCCCCTATCTCTATAGTGTGGACAT--  
----CCTTGGGCAAATTGTCTAACCTCCCTGCGCCTCTGTTTTAGTTTCTGTACAGTGA-----A  
----CCTTGGGCAAGTTACATAATCTCTCAAGACCT--GTTTCTTCATCTCCAAAATGAGAGTAATA  
CCTTTCTTAAGTAAGTTA---ACCTCTTCTAAGCCTCATTTTCTCCACATGTA AAAATGGGAA-AACA  
-----CGGGCAAGTTACTGAATTTCTCTGCACTTTTCTTTTCGCATCTGTA AAAATGGGGATACTA  
CTAAGCTTTGATGAGTGATTTAACCTCTCTGTGCTTGA--TTTCTCATCTGTATAATGGGTGTA-TA  
----CTCACAAATGTTTACATAAACCTCTCTGTGTTACAGTTTCCCTAGCTGCAAAGTGTAGATAGAA  
-----CTCAGTT--CTGGTCTTACGCTTCA**GGTCAT**G  
-----CTCCTCCGTCCTCAGCTTCCCTCATCTGTAAAATGGGGAAAACA  
-----CTCTGTTGGTTCCCTCTGAAAGTGTGATAATG  
**CTGACCT-ACAAA**ACTGACCTGATCTTTCTGAGTTC--TTTCTCACCCATAGAATGAGT-----  
**CTGACC**TCTGGCAA-----  
**CTGACC**TTGAGAGAGTGGGTTGGCCTCTCTGTGCTTCATTTTCTTTGCTTCTAAAATGGAGGTAATA  
CTGACTT--GGCAGGCAACTTCACCTGT-TGTGCTTCCGTTTTT-CATAGATAAGATG-----  
CTGACTTTGAACAAGCCACTTAACTTTTTCATGCTACATCTTCCACAAAATTTAAAATGAGGATCATA  
CTGAGGTCTTATAAGCTGTGTAACCCCT---TGCCTCAGTTTTCCCATCTGTAGA-TGGGGACCTCT  
CTGATATTGGCCAAGTTCCCTAACCTCACCTTGTGTCAGTTTTCCCATCGGCAAAA---GAATGATA  
CTGATCTTGTGTGAGTTCCCTAACCTCCCAAACT--GTTTCTTACCTGCACAATGGGGGTGAGA  
CTGGATTCAAACCC-TAACCTCACCTTCTTGGCATCAGTTTCCCTCATCTGTAAAATGGG-ATAATG  
CTGGCCTTGGGCAAGTGTCTGTGGCCTCCCTGAGTCACA**GTGACC**TCCACTGTACACTGGGGAGAAGA  
CTGGCTGAGGCCA**AGTGACTTAAT**CTCTAAAACCTTCA---TCTTAACTTGTACAATGTATATTA  
-----CTGTGCCTCCACTTGTCTCCTCTGTGAAAGGG----AGTG  
-----CTGTTTTCTGTTTCTAAAAGGAGATAATG  
----CTTGAGCA**AGTGACTTC-CT**TCTCTGGGGCTCAG-----  
----CTTTAGGCCATCAACCAGTTCCTCTGTGCCTCCGTGTCCTTATTTCTAAGAGGGTAATGATG  
----CTTTGGGCAAATTGCTTAA-----TGTCTTACCTTCGGTTTCTTTAGAACTG-----  
-----CTTTGGGCTTCCAGCGCCCTCACATGTGAAATGGGGATGACA  
GAAACCTTGACAAGTCCCTTAACTTTCTACGTCTTAAA--CCACATCTGTAAAACAACAATAATA  
GAAAGCTTTCAAAAACCAC**TTGACC**TCTCAGTGCCTTAGTTCCTCACCTGTGAAATGGGGATAACA  
G--ACACT**AGCTGTGCTCACT**TAACTCTC-ATGTCAGTTTTCTCATCTGTAAAATGGGA**ATGACC**  
GACTCCAGGCAGGTTATTTAAATATCTGTACCCTAATTCCTCATCTGTAAAATGGCAATAAAA  
-----GACAGTA  
--GACCATGAGCCACCTT**TTGACC**ATTCT--GCTTCAGTGTCTCGTGTGTA AAAACGAGAAAATA  
-----GACCTCTGTTTTCTCATCTG-AAAATAAGGAAGTT-  
G--ACCTTAGGCCAGTTTCTTAACTCTGT-TGAGTTTGTTCCTCA-----GAATAATA  
--GACCTTGTGCAAGCCACTTAACTCTCTGTGCCTCAGTTTCCCAGCTGTGATGTGAGGTTAATA  
GACTCCTTGGGCAAATTGTCTCCCTTCTCAAATCTCAGTTTGTCTCAGCTGGAAAATAGAGATGCTA  
--GACTGTGGGT--GTCAGTTGAGCTGGCTGTGCCT--ATTTCTCATCGGGGAAACAAGAGTCATT  
GAGACC-----  
GAGACCTAATGGACGCTGCCCAACCACCTGTGCCTCAGGGTCCCTGTAGGTA AAGTGAGGATAACG  
GAGACCTAGGGCAAATCAGCTAACCTCTCTGTGTCTCCATTTCCCGATCTGTGAAATAA**GGTCAATA**  
GAGACCTTAGGCAAAGCACTCCACCTCCGGGAGCCTCATTTTCTCCACTG-----  
GAGACGTGTGGCAA**AT**-----**GACC**CCCTG-GCCT--GTTTTCTTCTATGAAATGAGACT----  
GAGAGCTGGGCG---TGCTTAAACCATCCACACCTCAATTTCTCATCTG-AAAATGGGGATGATA

GAGATCTTAG-CAGAGTGATTCACCCCTCCAGGCCTTGGTTTCCTTTTGTAGTACAATGAGAGTG---  
GAGCCTTTGGTCAA GTTATTTAATCTCTGTCAACATCAAT--CCCCAACAGTAAAATCGGGTTAATT  
GAGTCCTGGGGCAAGTGGTTTGGCCTTCTGTGCCCTCAGTCTCCTCATCTACGAAACGGGGATTAGA  
GATACCTTGAACATGGTACTTAATCTCTTAGCATCTCGATCTCTTTATTTT----ATGATGGCAACA  
--GATGTTGG-CAGGCCACTTGACC TC-CTGTGCCCTCAGTTTCCCTCATCTGTAAGAGCGGG-----  
G--ATGTTGT-CAACCTACATAGATTCTCAATTTTTCTCTTCTGTAAAGTGAGTGACATTTATAATA  
GCAAACCTTGGGCAAGTTGCTTGACC TTGCTCAATGTCAATATTCTTATCTGTGAAAAGAAGATGATG  
GCAACCT---GTGAAC--CTCAACCTCTCTGGGCCTCAGTTTCC-CTCGTGTAAATGGGCATAATA  
GCAACCTTAG----GTTAGTAACTTCCCTTTGTTTCAGTTTCTTACCTCTAAAATGGA---AATA  
GCAACGTTGGGCGAGTCATTTAAC-----  
-----GCAACTTAAA-----TGTGCCTCAGCTTCCCTCATCTGTGGAGTGGTGTGTTG-G  
GCAATTT-----GGTCACTAA--CCCTCTGTGACTCAGTG-CCTCAACCGT-----GGGTATCATA  
GCACCCTTGGGCAATTTGCTTACCCTTGTCTGGACCT--GTCTTTTTCATCTGTACGATGGGGATACTA  
GCAGGCTTAAGCAAGTTATCTAATCTCCTGGTATCTTAGTTTCTGCACCTATAAAATGGAGGTAATA  
GCAGTTCTGGGCGGGT-----  
-----GCCACTACTCCTCTCCGGGCCTCAGTTTCCCTCCTTTGTTCAAGGAG-----  
-----GCCAGTGACTTCACCTCTCTGACC TG CAGTCTCTTCATCAG-----  
-----GCCTTGGTTTTCTCTTCTGAAATCGGTGATGATA  
GCGACCTTGGGAGGGTTGGGTCTCTCCCTGGGCCTCAGTTGCCCTCCTCTGTGCCCTGGGAGGGTC-  
GCGACCTTGGGCAAGTTACTAAAAGCGGCTGGGGTCTTGGTGACCTCATCTGTACAATGTCCATGACG  
GCGACCTTGGGCAAGTTTCTAGTCCCTCTGCGCCTCAATTTCCCACCTATAAAATGGGGA-----  
GCGGCCCTGGGAAAGTCACTCG-CCTC-----  
GGAAACTAAGGCAC-TTGCTTAAAACCTTCTG-ATGTGATTTTTCTTAACTATAAAAGTAGGGATAACA  
G-GAATTCGGGCAA-TCACTTGACC CTACATGCCTTAGTTTACTTATCAGTAAAATAGGGATAATG  
-----GGCAAGCAACTTAAACCCCTCAGTGACTCGGTTTCCCTCATCTGTAAAACAGGAACAATG  
-----GGCAAGTCACT-GGCTTCCCTGGGCCTCAGTTTCCCTAATC-----  
GGCACCTTGGACCAATTATGTAAGCATGTTGTGC-TCAGTTTCCCTGATCTACAAAATAGGGTTAATA  
G--GCCACGAC--AGTTCCCTG-TGCCTCAGAGCCTCATTTTCTTTCATCTGCGAGGTGCAGATAGT-  
--GGCCTGGTGCCTGTGACC TC-CTCCTCTCGGCCTCAGTTTCCCCGCCGTAAGACGGGGATGGTA  
GGGACCTTACGCCGGCCTCTTAGCTCCCTGTGCATC---TTCCTTATCTGGGAAGTGGCAGTTTCA  
GGGACCTTGGGCA-----CTTACCTCTCTG-GCCTCAGTCTCTTCTTCTGT-----  
GGGACTCTGGGTGAATC-CTTTGCCTCTCAGAGCCTGGGTTTCTTGGCTTGTAAAATGGAGATGATA  
GGGACTTTAGGCAAATTGTTAATCCTCTCTGATTCTCAATGTCCCTCACCTGCAAA--CAGAACAATG  
GGGACTTTGAGCAAGCTGCAAAATCTCCCTAAGACATACCGTC-TTACCTTTAAAAGGGAGGACACA  
-----GGGCAAGTCACTTTCATCTCCCATGTCTCACCTTTCTCTCAGTTACATGGTGAG----  
-----GGGCAA-TAGCCTCTTCTCCCTGTGCCCTCAGCTTCCCTCA---GGAAGAGGGGGAGAACA  
G-GGCCTCGGGCAAGCTGCTCTGCTTTTCTGTCTTAGGGTCTCCGTCTGTAAAATGGG-ATCACA  
GGGGCCTCAGGGACAT--CTTTCCCTCTTTTGTCTTTAGTTTCCCTCATATGTATAAAGAG-----  
GGGGCCTTGGCAAAAGCACCTAACGTCTCACTGCTT-GGTTTCCCC-TCTGTAGATAGGAGATGTTG  
GGGGCCTTGGGCAACTGACACACCCTCTTAGGCCTCAGCTAC-----  
GGGGCCTTGGGCAAGGCACTGTACTGTTCTGGGCTT-GGCTTCCCTAGTTTGTACAA--GTGTTAGAA  
GGTACAGTAAGCAAGTCACTAAGTCTCCTTAAAGTGTAAAATTTCTATCCA-AAAATGGGTACAATG  
GTAACATCAGCCAAGTTATTTTCATCTCCCTGTTTC---ATTACCTCATTGTAAAATGTGGATTATA  
GTAACCTTGACC ACTAGGCTCAATGGCTGTGT-----TTGCCATCTGTGAAACAAGGATGATA  
GTAACCTTGGGCAATTTACGTAATCT-----GTTTCTTGAACGTGAAACTGGAGATAATA  
GTAAC-TCGGCCGAGTTACCTAATCACTCAGTGGTTCAGTGTCCCATCTGAAAATGGACTTCTCA  
GTAAC-TTGATCAGATTA----AACTCTATTAAC-----  
GTAACCTTGGGCAAGTTACTAAAACCTTCTTGTGCGTCTGTTTTCTCATCTGTGAAATGAGCGTAACA  
-----GTAATAAATA  
GTAATCTCGGACAAGTTACCCTACCTCTCAGGACCTCAGCTTCCCTTGTCTG-----  
GTAATTTTGG-CAAGTGAGT--ACCTCTCTGAAATTTCTGTTTCTTTGTAGGCAAAA-----  
GT-ACATT---CAAATCATCTACCCTATCT-----CAGTTTCTTTCATCTGTGAAATACAGATAATA  
GTAGCCACGGGCAAGCTGCTTCCCTCTCTAGGCTT--GTTTCTTCCCTGCGGAAGCAGAG-----  
GTAGCCCTGGGCCTATCACTTAATATTCTTGTGCCACAGTTTC-TTATCTTCAAAATCTGGATAATA  
GTAGCCTTAGGCAATCAACGTAACCTCTTTGTGCCCTCAGTTTTCTTATCAGACAAATGGGGATAATG  
GTAGCCTTAGGCGGGTCGCC-ATCCTCTCTGCG-----  
GTCACCACAGAAAAGTCATCTAACCTCTCGGTGCCCAGTCTTGTCTCTGTCCA-TGGCAATTCGG  
GTCACCTGGCTTCTCATCTGAAGCTGGCAGTGTGCGGCTTCCCTCATCTGTGAGGGCCACAGTA

GTCACCTTGAGGTGGT--CTTAACCTCTCTGGGACTC--TTTC-----  
GTCACCTTGGAC-----TGTGCCTCAGTCTCCTCTGTCGT-----GGGGTGACA  
GTCACCTTGGCGTGAGTCCCTCCAACCACCATGTGGCTTCGTGGCTTCATTTGTAAGTGGGG-CAAGA  
GTCACCTTAATTGAATGGCTTAACCTTCTCTGTGTCCTCAGTTGAATCATTGTACAAAGGAGATATTA  
GTCAGCTTGCCCAGTACCTGCCTTTTGTGT-----GTTTCCTCACATATGGAA-----  
GTCATCTTGGACATGCC-TTCAGCCTTTCGAGTCTGAAGATTTTGGCCTTGTATTAATTAGAATG  
GT--CCTTGGACAAGTGGCTTAACCTTCCCTTGGCTTCTGTTTCCTTGCCTACAAAACGGGGATGATC  
GT--CCTTGGGCACATTGCACCACCTCTTGGGTTTCAGTTTCCTTGGCTATAAAGTGGGGATAATA  
GT--CCTTGGGCGGGTGA CTCTCAATGAGTCTGTTTTCCATTGTAAAGATGGGATCCATA  
-----GTCGATTAACCTCTACGCTTCATTTCCCTTGTGTTGAAAATGGAGATAGTA  
-----GTCTCCTCACCTGTGAAATGGGGCTAATG  
GTGAACTGAGGCCAGTAGCTCAACTTCTCTGA-----  
GTGAACTTGTGCAATTTACTT-----TCTATACTTCAGAGGGCTGACTTGTAAAGTGGGCTTAATA  
GTGACAT-----AATCTCTTCATGCCTCAGTTTCGCTTATTTGTAATAAAGTTAATA  
GTGACATCCGGCAATTGACAGGTGAGCCCTGGTCTTAAGTCTTCTCTGAAAAATGGGG-TCCTA  
GTGACATTGAACAAGTTATT-----  
GTGACATTGGGGAAGATACTGAATCTTGTCTGCAAGTCAGTTTCTGCATTCCCTAA-----  
GTGACC-AGGCAAGTTACTTAACCTCT-TGTGCAGCTGTT-----  
GTGACCCTGGCAAGCCA----GCCTCCCTGGGTCTCTGTTTCTTCATCAGTAAAAACAAAAGGCTTG  
GTGACC-GGGCAGGCTGCTTAACCTCTCTGTGCCCT--GTTTCCTCCTCTATAAAATGGGTTTTTA  
GTGACC-GGGCA-GTGAGTTCATTTCTGTGCCCT--GTTTCCTCCTCTATAAAATGGGTTTTTA  
GTGACCCTAATCAGGTCATGTAACATTGCCATGCATCTGCCCTCTGCTGTAAAACTGGGATCATA  
GTGACCCTAGGCAAGTTACTCAACCTCTCTGGGCTCATCTCTGACA----CAGGATGACAGCAGTC  
GTGACCCTGACCTAGTCTCTTGCCTCTCTGATCTCAGTTGCTTTATCTGTAAAAAT-----  
GTGACCCTGAGCAAATGACTTAAATCCACAGTGA CTCTCAATGAGTCTGTTTTCCATTGTAAAGATGGGAC--  
GTGACCCTGGACAAACCACTCCCATCTCTGGGTCTC-----  
GTGACCCTGGACAAGTTACCCAGCCTCTCTGGGCTTGGGTGTCCCCTTGGGCAAAATGGG----ATA  
GTGACCCTGGCACGTAACCTGACCCTCGCTGTGCCCTCAATCCCATCACCTGTAAGACGGTGCACATG  
GTGACCCTGTGCTAGTTGCTTAACTTCTCTAAACTTCCGTTTCCCCTCTGTAAAAATAGAA--ATA  
GTGACCCTGCTGGCAAAGTCTTGGACCCTCGGCCAGTCTGCCTTCCCTGATCCAGGCAGTGGGGAC----  
GTGACCCTGTTGGCAGGTGACTTGGACCCTCCCTG-----AGTTTCCTCATCTCTAAGATGGGGACAAT-  
GTGACCCT-----  
GTGACCCTAGAGCAAGTCACCCCATGACTTTGGGTTTCAGTTTCTTCCCAACAAAATCAGCCAACTC  
GTGACCCTATAAAAGTCACTTTTATCTTCCAGGCTTCTGTTTTTTTTTCTATAAAACCAAAACAATA  
GTGACCCTCAAGCCACTTGCCTGA-----TTGGTTTCCTCACTTACAGAATGAACGTGGGG  
GTGACCCTCAGACAAATTAACCTCTCTGTGCCCTCAGTT--CTTATCTGTGAGATGGAGATAATA  
GTGACCCTCAGAT--GTTATCTAGATTCTGTATGCTTGGGTTTCTCATAAGTAACCTGGAGATGGTT  
GTGACCCTCAGGCAAGTCACTCGG----CTCTCAGCTTCTGACCT-----  
GTGACCCTCAGGCCAGTCAACACCTCTCTG-----  
GTGACCCTCAGGCCGTTCTCTGACCCTCTGTGCCCTCCTTCCCTTCTCTGTAATGTGAA-ACAACA  
GTGACCCTCAGTCAAGTGGCTTAACCTCTCTGGGCTAGTTTTCTCACCTACAAAACGGAGATGACA  
GTGACCCTCGAG---GTAACGTAACCTGTGTGT-----  
GTGACCCTCGGGAAAGTTAATTAACCTCTCTGTGTTTCAGTCACTTGTCTTTACAGAGAGGATGTTG  
GTGACCCTCGGGCAAGTTGCTCGGCCCTCTCGAGCTTCTGTGCTTTCATCTATAGACTGGGCATA-TA  
GTGACCCTCTAACAAGTTTCTTATCTCTCTGTGCCCT--GTTTCCTCAT-----A  
GTGACCCT-----CTCTACCTCAGTTTTTCCATTGTAAAAATGCGGATAATA  
GTGACCCTCTGGCAAGCTACT--GTCTTACCTCCTCAAG---CCTTATCTGTA--ATGGGAATAACT  
GTGACCCT-GAGCAAGTCATTTCTCTTCTCTGCTCAGTTTTTCCCATATG-----  
GTGACCCTGGAGCACATTTCTTAGCCTCTCAGTGTGCTGTTTACTCATCCGTGAAAAGGAGATAACA  
GTGACCCTGGATCCAGCTACCAACC-----CTCATCTGTGAAGTGAGG-----  
GTGACCCTGGGACAAGTTGCTTAACTGATGTGCCACAGCTTCTTATCTACACAGTGGAGGT----  
GTGACCCTGGGACAATCCACTCTACCTGTCTATGCCCTGATGAGCTCATCAGTAAAGTGGTGATAGTA  
GTGACCCT-GGGCAAGTTACTCCATCTCTCTGGGC-----  
GTGACCCTGGGCCAAGTTACTTTACTT-----GCCTCTGTCTGTTTATTTATAAAATCAAGATAAGG  
GTGACCCT-GGGCGGGTTACTAACTTCTTGTGCCCTCAGTTTCCTCATCTGTAAGACGAGGGTAATA  
GTGACCCTGGGGCAAATCAAC-----CTCTGGGCTCACT-----  
GTGACCCTGGGGCAGAAGACTT--CCCTTCTGTGCCCT-----  
GTGACCCTGGGGCATG--ACTTAACCTT--GCTCTTCAGTC-----

GTGACC TGGGTGGAGTTATCAA --- TCACG **GTGCCC** CAGTTGCCTCAGCCATGAAGTGGAG -----  
GTGACC TTAATAAATGGCA - GTCCTTTT **TTGACCTCAG** -----  
GTGACC TTAACCTT **GGTCAG** TTGACATCTCTGGTCTTAAGTTTCCTAATCTGCAACATTTGAAGGTT -  
GTGACC TTAAG --- ATTCCTTAACCTCTCTGAACTCAGTTTCCTCATCCATAAAACAAGGAAAATA  
GTGACC TTAAGCAAGTCCCGTA - CCTCTCTGGGCCTC -- CTTTCTCATCTCTAGAGTGAGGATGATA  
GTGACC TTAC - **CCAGTGACTCACT** CTCTTTGGGCCTCAGGCTACTC - TGTATAAA -----  
GTGACC TTA -- CCCGTTAC ----- CTCTGTGTTTCACTTTTGCCTCTGTGAAATGGGGATGATA  
GTGACC TT ----- ACCCTTCT ----- CATCATATGCAAAATGGCGATAAGA  
GTGACC TTAGATACAC - ATCTAACCTCTCTGTCCCTCATTTTTTTCATCTGTAAATGGGGATACTA  
GTGACC TTAG - CAAGACATTTCTCTTCTCTGGAA -- CAGTTTCC -----  
GTGACC TTAGGCAAGTT - CTTAACTTCTTTGAGCCTCTGTCTTCTCATCCGTA AAAATGAGCATAATA  
GTGACC TTAGCGGTGTTACTTAC - TTTCTGAACTCAGTTTCCTC -- TTGTGAAGTGGGG -- ATG  
GTGACC TTCAGCT - GTTGCCCAACTGGTCTGAGTCTGGGTTTCTCAACTGCAAAATGGAGAGGAT -  
GTGACC **TTCC** - **T**AGTACATCCCCTCTGAGTCTGGCTGCCTGATGTGGCAAATGACGGG ---  
GTGACC TTG -----  
GTGACC TTGAACAAGCTA --- AGTTGTCTGAGCCATAGTGTCCCAAGTGCAAAATGGGATAAAAG  
GTGACC TTGAATCAACCACTTCTCTTTCTTTGGCCTGGTT - CCTCATCTGCCAAAGAGGGATAATA  
GTGACC **TTGACC** AAATCACGGAATCTCTCC ----- CAG --- CCTCATTCATAAAATGAGGATAATC  
GTGACC **TTGACC** AAGTCCCATCCCCTCCCTGAGCCCCAGTATGTGCATCTGAAAATCGAGG -----  
GTGACC **TTGACC** AAGTTACTCAATCTCTTTGTGCCT -- GTTTCCCTCACTTATACAATAGGTATTCTA  
GTGACC TTGAGCAAGTTAGTTAACCTCTCTGTGCCTCAGTTTTCTCATCTGCAAAATGGGGG -- GTG  
GTGACC TTGAGCA **GGTGACTCAGT** CTCTGTTTGCCTGA -----  
GTGACC TTGAGCCA - TCACTAAC ----- TCAGCCTCTGCTTTCCTA - CTGTAAAGAGGGGGTAATA  
GTGACC TTGAGGAAGTATTTAACCACTGTGCCTCAGTCTCATCATCTGAGAAATGGACAT ----  
GTGACC TTGAGTCATAACCCAAAGCCCTCTGTACCTCCATGTCCCCCTCCATAAACTG -----  
GTGACC TTGAGTGGCTG --- TGAGCTCTG -- GCCTCGGTTTTCTCATCTGTAAAATGAGA -----  
GTGACC TTGCACAAGCAATTTGACTTGCTTGTGGTTCAGTGTCTGTTTGTAAAATGAGGATA ---  
GTGACC TTG -- **CAGGTGACTTCAT** CTAGCTAAGCCT -- GTTTCCCTCATCTCTAAAATGGAAGTCAA -  
GTGACC TTGGACAAAT - CATCATCTGCCAGTGCCTCAGTTCCTTGACTATGAGATGGGG - CATCA  
GTGACC TTGGACA **AGTGACTTCAC** CTCT -- GTGCGTCGACTTCCTGCTGTCTGAAATAG -----  
GTGACC TTGGACAAGTTATTTAACCTC ----- ATGTGTCAAGGAGGGAACATA  
GTGACC TTGGACATGTTGTGGG - TCTCTCTGCCTCTCGGT ----- TCTGTGACCTGGGCATAGT -  
GTGACC TTGG - CAATTTTCTT --- CTCTTTGAGCCT - AGTTTTCTCATCTGTGTTATAGGAAAAATG  
GTGACC TTGGCCAAATAACTC -- TCCTTCTGAGCCA - ATTGTCATCATCTATAAGATGAGATTCT -  
GTGACC TTGGCCA **GGTGACCCCTC** CTCTCCTAAGCCTGAACTTTCTTCTATACAATCAGCGG ---  
GTGACC TTGGGCAAAATTAATCAT -----  
GTGACC TTGGGCAAAATTTAACCTCTCTATATCTCACTTTCCCATCTGTAAAATGGGGATAGCA  
GTGACC TTGGGCAA --- CTTAGCCCTTTTGTGC --- AGCTGTAAAATGAGGATGGT **GGGCAC** CCCCA  
GTGACC TTGGGCAAGGTATT ----- CCCCTTACCGTATTT ----- AAATGGGAATCATA  
GTGACC TTGGGCAAGTCACTCAGCCCCTCTGGGCCT - GCTTTCAACATCGATA -----  
GTGACC TTGGGCAAGTCCCTGGTTCATTCTGGGACTCTGTTTCCTC -----  
GTGACC TTGGGCAAGTTACTTAACTCTCTGGGCTTCTGAGCTGCC - CATCTGTAAAATAGGGATAATA  
GTGACC TTGGGCAAGTTACTTAACTTTCTGCGCCTCGCCTTCCCTGTCTCTTAAATGGAGATCATA  
GTGACC TTGGGCAAGTTACTTAACTCTCTCCATGCCTCAGTTCCTTCACTTTTCCATGGATGTAATA  
GTGACC TTGGGCAAGTTACTTAACTCTCTGTGCTTCTCAGTCTTCTCACATGGAAAATGAGACTAATG  
GTGACC TTGGGCAAGTTATT -- GCCTTACTGGGTCTCAA ----- CTGAAAGAT --- GATGATA  
GTGACC TTGGGCAAGTTGTTAACTTTGCTATGTCTTAGTATCTTAACTGTGCAAAATGGGAATAGCA  
GTGACC TT **GGGCAC** AGTCCCTGAATTTCTTTGGGCTTCTGGTTTTCTTGTCTATAAAATGAGG -----  
GTGACC TT **GGGCAC** CTCTTTAACTCCCATGCACC -----  
GTGACC TTGGGCA **GGTGACTTCGC** CTCTGAGCGCCTCAGTCTCCTCGTCTGAACGATGGGT - TAACA  
GTGACC TTGGGCA ----- GTTTCTTTCTGTCTAAAATGGG - ACAGTA  
GTGACC TTGGGCCA ----- TCTCTAACTAACTTGTATCTTTAAAACAGGTATAATA  
GTGACC TTGGGC --- CCACCCCATCTTGCTCAGCCTCAG -----  
GTGACC TTGGGCGAGCTGACTAATGCCATTGATTCTTGCTTTCCCTCATCTGTAAAGAGGAA -----  
GTGACC TTGGGCTTGTTACT -- ACCACTGAG --- **GTCAG** TTTCCCTCAAGT --- AAACAGGTATAATA  
GTGACC TTGGGCTTGTTACTCAGTTTCTCTGTGCCGAGTTTC - TCATCTGTAAAA -----  
GTGACC TTGGGGAAGTGACATAGCAGCCCTGGGCTT -- GTCTCCATGTCTGTA -- ATGGACCTAACA  
GTGACC TTGGGGAAGTTACTGAACTGTTTTGT - TCTCTGTTTCTTATCTGTAAAA - GAGGATGTGA

GTGACCTTGGG-GACTTGATCAAAATCTG---GCCTCTGTTTCTTCATCTGTAAAAGAAGGATAAAC  
GTGACCTTGGGGAGGGCACGTGAACCTCTCCGAGCCTCAGTTCCCGCCTCTGCAAACCTGGGAATAATC  
GTGACCTTGGGTAAAC-ATTTAGA-----TCAATTTCCCTCAAGCATTTGAAAAGAAAAGGA  
GTGACCTTGGGTACATTCTCAATCTCCCTGATCAGCAATTGC-TCTTCTCTTAAGCAAGCAGTA-G  
GTGACCTTGGGTAGGTAGCTTGCCTTCTGGGTGTTAGTTTCGCCTTCTGTAAAATAAGGCTGCTG  
GTGACCTTGGGTGAGTCACTTAACCTCTCTGTGCCTCAGAGGCCTCATCTATAAAATGAGGGTTTCA  
GTGACCTTGGGTGTGCAC-----  
GTGACCTTGGTCAA GCTACTGAACCTCTCTA-ACCTCTAATCCTTCATGTGTAAAATGGAGATAATC  
GTGACCTTGGTCAA GTCAATTAACCTCTCTATGTTTTGGTGGTTTTGTGTATAAAATGGGGATAATC  
GTGACCTTGTGCATGTCATTTTCATCTCTTAGAGTCTCTGTT-----TCTGTAAAAGGGAACATAA  
GTGACCTTTAGCAAGTTACTAACCCTCTCTGTGCTTCAGTTTCCCCATC-----ACGGAGATAATA  
GTGACCTTTAGTAGTATACTTAACCTCTCATACCTCAGTTT-----TGTGTAAAATAAAAATTATA  
GTGACCTTTGCCTGGTCACTTT--CCTCCCTGAGCCTCTGTCTCCCCATCTGTGTGGTGAA-----  
GTGACCTTTGGCAAAGTGAGTCACTCTGTGCCTCTGT-----  
GTGACGATGG-CAAGTCAATTA-----TCTATGA-TCAGTTTCCCTTAGCTTTAAAATAGGAATGATG  
GTGACTCTGGG-AAGTCAACACACTCTCTGTGCCTCAGGCTCTGGTTCTG-AAGATGGG--AACG  
GTGACTCTGGGCAAGTTACTTCATG-CTTTGTGCCTCAGTTTCCCTCATCTGTGAAATGGGGATGTA  
GTGACTGAGGGCT-GACATGTCTTCTCTCTGAGCTTCACTCTCC-----  
GTGACTGTGGACGTGTGACTTACCCCTCTGTGCTTCA-TTTCTCCACCTGAGACACAGGACTAACA  
GTGACTGTGGGCAA GGTCACTTCACTCTCTGTCCCAGCTGCCCATCTGTGTGATTACACTAATA  
GTGACTGTTGGCAACGTGCCTAACATCG-TGTGTCTCAGTGTACCCTCCGTAATAAGAGGACGCAG  
GTGACTTTAGGCAGATTGCACGACCTCTCTGTGTTTCAATCTCCCCATCTATGAAATGAGATTAATA  
GTGACTTTGAGTCACTCCCCATCT-----  
GTGACTTTGGGAAAGTTATCTAACATCTGTATGCCCATTTTCCCTCATCTACAAAATGGAGATAATG  
GTGAGCCTGG-----CTTTCCGTTTTG---TCAGTTGATTCACCTCAGTCAGG----AATA  
GTGAGCTTGGGTGGATTGTCTTA----TCTGATCCTCAGGTTCCCTCATTTATAAAACAGAAATAAAT  
GTGAGTCACGT--AGTTATTGAATCTGTCTGTGCCTCAATTTCCCTCATCTGTAAAATGAGGATAAGA  
GTGAGTGTAGGCAAATTAATCTCTCTGAGCCTCATTTCCTGACTCCAAAATGGGGATAATA  
GTGATCC-AGGCAAGTCACTCAC-----GGACCTCAGTTTCC-CATCTGCAAAAATGGG-ATGATA  
GTGATCCCGCCGAGCTATTCTATCTTCCCTGTGTCTCAGTTTGGCATCTGTAAAGTGGGGATAA--  
GTGATCCTGGGCCGATGACTCATCTCCTCT--ACCTCTGTTACCTCGTCAGTAAGATAGAGATAACA  
GTGATCCTGGGCGAGTTGTTTTACTTCTCTGGGCC-CTGTGACCCACCTTCAAAAATGAG-----  
GTGATCT-GGGAAAGATGACGTAACC---CTGAGCC-CGATTTTCTTATCGGTGAAATGGG-----  
GTGATCTTAGATAAGGATCTTCATCTGTCTCT--TTCCATTTCTTCATCTGAAACCTGGGGCTAATG  
GTGATCTTAGGCAAATTACTGAACCTTTCTGTGTTCCAGTTTCTTCAGCTGCAAAGCAGGGACAATG  
GTGATCTTA-----TGATCTACCTCTCAGTGCCTCTGTTTACTTATCTG-AAAATGATGACATTA  
GTGATCTTCGGCAA GTGACCTAACTTCTCTGATCTTTAGTTTCCCTCTAGTAAAATGAGGATAATA  
GTGATCTTGAGAAAAGA-GTTGAGCCTCTCTGGGCCCTGGCTTCCCC-----  
GTGATCTTGACAAGTTATTTAACTTTCTGTGCCTCATTTAACACATATAAACATGGGGATACCA  
GTGATCTTGCCAAAGGTGCTTAAATTTCCAT-CTGTAAAATGAGTATAATGATAATGATGATGACA  
GTGATCTTGGGCAAGTAACTTCAGCTTTTTGT--CTCAGTTTCCCTCACCTGTAAAATGGGGTAATA  
GTGATCTTGGGTAAACACCTCTGACTCTCTGGGCATCAGTTTCCCTCCTTTAGAAAAGT-----  
GTGATCTTGGGTAAAT-ATTTAA----TCTGTGCCTCAGATTCCCTCACTGATAAACTGGAATAA-A  
GTGATGT-GGACAAGTCACTGACCCCTCTCGGCC--GTTTCTTCATCTGTCAAATGGGCGTCATG  
GTGATGTTAG---ATTGCATAATCTCTGTGTCC----ACTTTGTCAACTGTAAAATAGAGGGTGA  
GTGATGTTGGACACGTAACCTCAGTTTTCCGAGCTTCAAGTTTTATTGTCTGTAAAAGCAGATTAATA  
GTGATTCGGGGCATGCACTTGGCCCTCA-----GGTTCCCTCATCTGTACAAT-----  
GTGCATCCTGGAA-----TGTACATTAGTTTCTTCATCTGTTAAAAGGGGAATAACA  
-----GTGCC-CAGCTCCCTTATCTGTAAAATGGGG-TACTA  
GTGCCCTGGAAACAAGTCACTTCTTTGTGCTTGTGT-----AAATATGGA---GAGATGATA  
GTGCCCTGGGGCGGGGAA GGTCACTTCTGTGCCTCTCGATCCTCTCATCTACACTCAGCTGGTGGTC  
GTGCCCTGGGGCAAGGCTTTCACCCCTCCTTAGGCTT--GTTTCTCAGCT-TACAAATGGGCTAATG  
GTGCCCTTAGGCCAATTGCTT-----TTAGAGCTTCAAGTTTTCTCACTTGGAAAGATGGGGATAATA  
GTGCCCTTGGGCAAATTGCTTACCTTCTCTATCCACATCTTT-----ACATCG  
GTGCCCTTGGGTAAAGTCCCCTAACCTGCTGTGCCT--GTGTCCCTCACTACATCACAGGTG-AGTG  
GTGCCTTCAAAAAGACATGTGACCTCTCTGCGCCTTAGTCTCCTCATCTGAAACATGGGAACA---  
GTG-CCTTGGGTCCGATACTTAACCTCTCTGAGTCTTT-TTTCCTCCCTGTAAAATGGGGTAATA  
GTGCCTTTGGTTAAGTCTGAACTGCTCTAAGCCTTAGTTTTCCCATATGTAAAATGGGCTTAATA

GTGCTCTTGATACGCCAGT-ATGCCCTCTAGTCTTCATTATCCTCATCTGTACAGTAGAGATAATA  
GTGCT----GGTGGGTATTATA---CCCTCATTGGCCTCAGTTTCCCC-TCTGCACAATGGGGCTGGCG  
GTGGCCACAG-TAAGCCACTC-----CTCTGTGCCTCAGCTTT-TCTCTAGCAAAATAGA-ATGCTG  
GTGGCCCTTGGTG-----CTCTGTGCCTCAGTTTCTTCTGT-TAAACTGCAGTTAATA  
GTGGCCGTGGGCAAGTTACTTTCATCT-TCTGTGCCTTTGTTTCTGGCATGCATAAGAAGAATCATC  
GTGGCCTGGGGCAAATTAC-----GCCCTGGGACTCTCACCCGCAAACCAGAGATAATA  
GTGGCCTTAAAAAGCTACTTAACTTTCTAACTTGAGCTTACTCATATACCAAATGGAGATGACA  
GTGGCCTTGGGCAA---CTTAATCTCTGTGCCTCGGGTTTCTATGTGTAA-----GATA  
GTGGCCTTGGGCAA---TCTAACCTTGCTGT---CTGTTTTCTCATCTGTAAAAATGAGGATAATA  
GTGGCCTTGGGCAAATTGTTTCACTCTCTGTGCCCAGGATCCTTATCTGTAAAA-----  
GTGGCCTTGGGCAAGACATTTTACCTA-CTGGCCTCAGTTTCTCATTGTAAAAACAGGGCAACTA  
GTGGCCTTGGGCAAGTCACTCA-CGCTCTGTACCTGAGCATGCACATTGGCAAAATGGGAACCGTA  
GTGGCCTTGGGCAAGTCACTTAACTTCTCTGTGATGCAGCTTTCTCACCTGTGCTGTGGGGACAGTC  
GTGGCCTTGGGCAAGTCACTCCATCTTCTAGGCTTGTGATTTC-----  
GTGGCCTTGGGTAAGTTGCATAAGCT-TCTGT-----  
GTGGCCTTGGGGCAGATTACTTAACTCTTTAGGTTTCGGTTACTTTACCCATAAAGTGCAGATAATC  
GTGGCCTTCTATAAGTCACTTTACTTTACTGTGCCTACGTTTCTAATTTGTAACATGAGGAGAATA  
GTGGCCTTGAACAAGCCACTTGACCCTCTGTGCTCCGGTTTCCCAGCTGGCAATTAGAGGATGGG-  
GTGGCCTTGGGCAAGTTACTTAACTCTCTGTGCTCCAGTTCCCTCTTGTGCCCAAAGGGATAATT  
GTGGTATTGGGTTGGTTACCTAACTGTCTATGCTCCAGTTTCTGATTTACGAATTTGGGATAA-A  
GTGGTTCTTAAGAATTCATCT-----TGTGGACCTCAGTTTCTAATTTATGAAATGAAAGGGTTG  
GTGGTTTTGGA-AGCTTGCCTAACCACTCTATAAACCAAGTGTCTGACCTGTA-----GGAACAC--  
GTGTC-----  
GTGTCATGGGCATGTTACTTTCATCTCTGTGCATCAGATTTCCCATCTCTAATATGGGGACAATG  
GTGTCCTGGGCAAG-----CTCCGTGCCCTGTGCCCTG-CTATAAAATGGG---AATG  
GTGTCCTCGGACATATGACTTTCCCTCTCCATGCCTCAGTTTCCCCTC-----  
GTGTCCTCGGGCAAGTATCCTT-CCTTTCTGAGCCTCTGGGCTTTCTTTGGGAAAATCGGGGCTGG  
GTGTCCTCGGGGAGCCAGCCTTCTCTCTTGGCCTTAGCTTGTCTCTGTCCAGTGGGG--GGT  
GTGTCCTTGGGCAAGTTC---ACCTCTCTGAACTT-GGTT-----  
GTGTCCTTGTGTGAGTACATCACCTCTCCAGACATCTGTCTTGTCTCATCTGCAAAATGGGGAGGAGG  
GTG-TCTCAAACAAGTCACTCAGTCTTGCCTGCCGTCAATTTTCTCACCTGTAAAATAGTAGGAG--  
GTTAACACGAGCAAGTGATTTAACCTCTTGGTTCCACATTTACCTA-CTGTCAATTTGGGGATTGTT  
GTTAACCTTTGAGTTTCACTTAACTTCTCTGTGCCTTAGATTTTCG-ATCTGTAAAATGGGGGTGACA  
-----GTTAATAAACCTTTCAAATATCAGTTTC-TCGTCTGTAAAATG---ATGACA  
GTTACCCTGGACAAGTTATTTGCCTTCTCTGTGCTTTAGTGTCCCCTCTCAAAGTAGGGATAATA  
GTTACCCTGAGCAAGT-ATTTATTCTGTCTATTTCTGATTTCCCTTG--TGATGAACAG---CATT  
-----TAACTTTCTGTTCTGTCATCTAGAATAGGGAGATAATG  
-TAACCTTGGG-AAGACACTTA---TCTCTGTGCCTCAGTTTCTCCGTTTGTACAACGAGAA-ATTA  
-----TACTCAACTTCCCTCGCCTCAGTTTCTCATCAGTAAAATTGAGGGAATT  
-----TACTCCATCCCTTTGAACCTCAGTTTCTTGTGTTGAGACTTTGG-----  
TCAGCCTGGAGCAAGTC-TCCGACCTCAGCATTCTCGTCTCCTCG-----AGTGGGGCCG-TA  
TCCACCTTAGACAAAATAACTCACTCCCC-----  
-----TCGGACAAGTCGTTCACTCTCAGAGCCTCAAAGTCTCAT-----  
-----TCTCAAGTTTCTCATCTGCAGAATGGAATAAGA  
-----TCTGAGCCTTATTTAGTGTCTCATCTGTAAAACGGGGAAATTG  
-----TGAATCCACATCTTTATCTGCAAAATCAGGAG----  
-TGACCTAGGACACATTTCTCACGCTCTCTG-----AATTTCT---ATCCATAAAACGGGCAAAACA  
-TGACCTTAAGCTAAT-----AACCTTTCATGACTCTATTTCCCTGCTTGTAAATGGGACC--CA  
-TGACCTTCAACAAATCATTTACCTTTGTGAGCCTAGCTTTTCTC-TGTGTAGAATGAGGGG----  
-TGACCTTGAACAAGTCTCCATCGCTCCAGGCCTCGTTTTTTCAGGTGTATATGATG-----  
-TGACCTTGGGCAAATTACCCAACCTGT-----TCCTTATTTGTT-----  
-TGACCTTGGCCAGGC-ACTCA--CATCCTGTGCCT--GTTTTCCCGTTTGTCAAGTGG--ACAGCC  
-TGACTTCAAGAGAGTTTCTTAGTTCTGTAAAGGAAAAGCT-CTTCATCTGTTAAATGGGGGTGACA  
-TGACTTCAGGAAAACCACTCGACTGCACTGAGCTTCAACATCTTCACTGCAAGGCAGGAA-AATA  
-TGATCTTGGACAACCTGATCTCAAATCTCAATGACTTTGTTTCTTCATATGTGATATGGAGATAGAG  
-----TGATT  
-TGCCATTGGCTGTGTTACTT----TTCTGGGGTCTCAGCTTCCCCTTCTGTAAAGCAGGGAGAATA  
-TGCCCTGGGGCAAGGTACTATCTATTTTGTGCCT-GGTCTCTCATTGAATAATAG--ATAATA

TGGACCTTGAG-----  
-----TGGACTTCA-CTTCATCATCTCTAAAATGAGATTAAG  
-TGGCCATGGACAAGTTTCATACCTTCTTTGAGCCTTGGCT-CCTCATCTGTTAGATGTGAATGGGA  
-TGGCCCTGGGCAAATTACTTAATCCCTCTAAGGCT--ATAGCCTTATCTCTGCA-TGAGGATAAAA  
-----TGTA AAAATGGGGAGAATG  
-----TGTGCCTCAGTGTCCCCAGCTGTGACATGGGTACAGGA  
-----T TACTCAACTTCTTTCTTTATCGATTTCCCTCATCTATAACATGTCAACAATG  
-T TACTTTGGGCAAATGGTTTAACTGTCTGTGCTGTGGTTCCCTTGT-TAAAAAATGAGGATAGCA  
-----TTCACCTGTCGCTACCTCAGTTTACCCATCTGCAAGATGCAG-TGGT-  
-----TTCAGCAGAGTTCTTTCTGTCACTTTGTGCTCGTTTCCGCATCTGTAGAATGGGGGTA  
TTGACAT--GGCAAATT-----ACCTCTCTGC-CCTTAGTTTCTCATTGTAAAATGGTAATA  
TTGACCTT----AAGCCTCCTGACCTGTCTGGGCCTC---CTCCTCCTCAGTAAG-----  
TTGACCTTGGGCTAGT TACTTAACCATT CAGTGCCTCAGTTTCTCATCTGTAAAAGAGGAGATAATA  
-----TTTCTAAAACACAGTTTCCTTGTCTGTAAAAGGAGGG-----
